# Supplementary material for: Genome-wide long non-coding RNA screening, identification and characterization in a model microorganism Chlamydomonas reinhardtii
Source: PubMed Central journal article supplement (PMC5034253; doi:10.1038/srep34109), 2016-09-23
Supplement: srep34109-s1.pdf [file srep34109-s1.pdf]

# Genome-wide long non-coding RNA screening, identification and characterization in a model microorganism *Chlamydomonas reinhardtii*

Hui Li<sup>1,2#</sup>, Yuting Wang<sup>2,3#</sup>, Meirong Chen<sup>1,2#</sup>, Peng Xiao<sup>1,2</sup>, Changxing Hu<sup>1,2</sup>,

Zhiyong Zeng<sup>1,2</sup>, Chaogang Wang<sup>1,2</sup>, Jiangxin Wang<sup>1,2</sup>, Zhangli Hu<sup>1,2\*</sup>

<sup>1</sup>Guangdong Technology Research Center for Marine Algal Bioengineering, Guangdong Key Laboratory of Plant Epigenetic, College of Life Sciences, Shenzhen University, Shenzhen 518060, P.R. China

<sup>2</sup>Shenzhen Key Laboratory of Marine Bioresource & Eco-environmental Science, College of Life Sciences, Shenzhen University, Shenzhen 518060, P.R. China

<sup>3</sup>Key Laboratory of Optoelectronic Devices and Systems of Ministry of Education and Guangdong Province, College of Optoelectronic Engineering, Shenzhen University, Shenzhen 518060, P.R. China

\* Corresponding author at: College of Life Science, Shenzhen University, Shenzhen 518060, PR China.

Tel.: +86 755 26557244; Fax: +86 755 26534274.

E-mail address: huzl@szu.edu.cn (Z. Hu).

# These authors contributed equally to this work.

## Supplementary Information

**Supplementary Data S1.** Classification of mapped reads into the known categories of RNAs.

**Supplementary Data S2.** The sequences of all 1,440 lncRNAs identified by CPC and Pfam.

**Supplementary Data S3.** Conservation blast results of all 1,440 lncRNAs.

**Supplementary Data S4.** Significantly differentially expressed lncRNAs under sulfur-replete and sulfur-deprived conditions.

**Supplementary Figure S1.** Statistics of alternative splicing events. (1) TSS: Alternative 5' first exon. (2) TTS: Alternative 3' last exon. (3) SKIP: Skipped exon. (4) XSKIP: Approximate SKIP. (5) MSKIP: Multi-exon SKIP. (6) XMSKIP: Approximate MSKIP. (7) IR: Intron retention. (8) XIR: Approximate IR. (9) MIR: Multi-IR. (10) XMIR: Approximate MIR. (11) AE: Alternative exon ends (5', 3', or both). (12) XAE: Approximate AE. X axis: numbers of AS events. Y axis: events types.

**Supplementary Figure S2.** KEGG enrichment analysis of lncRNA target genes significantly differentially expressed under sulfur-replete and sulfur-deprived conditions. Colors represents the expression levels of metabolic pathways. Red represents a high expressing metabolic pathway. Green represents a relatively low expressing metabolic pathway. The left column (+S) is the sulfur-replete sample and the right column (-S) is the sulfur-deprived sample. The numbers of significant different genes contained in each metabolic pathway are indicated in the parentheses

after the label of each metabolic pathway.

**Supplementary Table S1.** Reads mapping to the reference genome.

**Supplementary Table S2.** The qRT-PCR primers used in this study.

## Data S1. Classification of mapped reads into the known categories of RNAs.

| Sample name | C1                | C2                | CS1               | CS2               |
|-------------|-------------------|-------------------|-------------------|-------------------|
| mRNA        | 27138309 (75.53%) | 30405244 (76.45%) | 23268563 (66.86%) | 22508944 (68.36%) |
| pseudogene  | 2680 (0.01%)      | 2840 (0.01%)      | 11287 (0.03%)     | 11387 (0.03%)     |
| rRNA        | 884723 (2.46%)    | 813147 (2.04%)    | 34256 (0.10%)     | 31131 (0.09%)     |
| tRNA        | 4462 (0.01%)      | 4898 (0.01%)      | 4630 (0.01%)      | 3363 (0.01%)      |
| Others      | 7897957 (21.98%)  | 8543944 (21.48%)  | 11485580 (33.00%) | 10373498 (31.50%) |

Classification of Mapped Reads (C1)

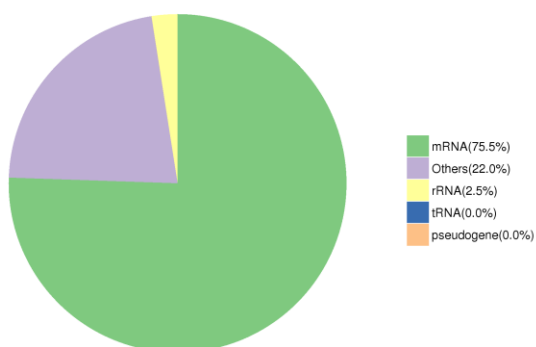

Classification of Mapped Reads (C2)

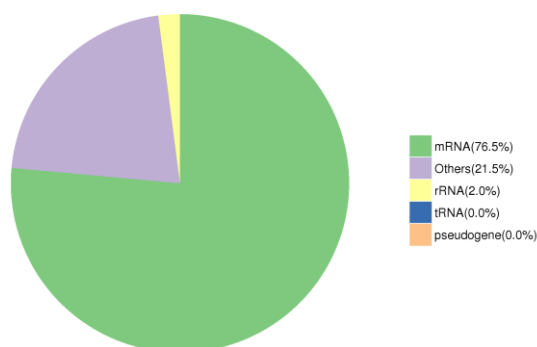

Classification of Mapped Reads (CS1)

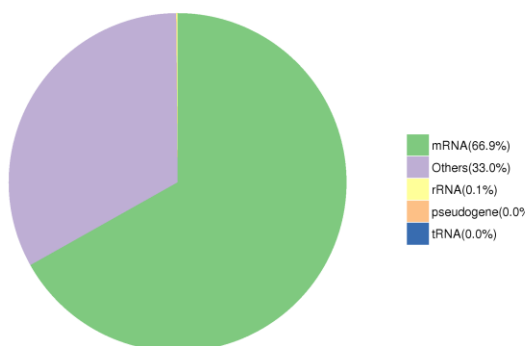

Classification of Mapped Reads (CS2)

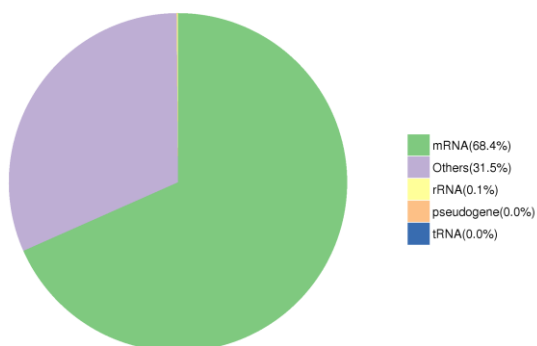

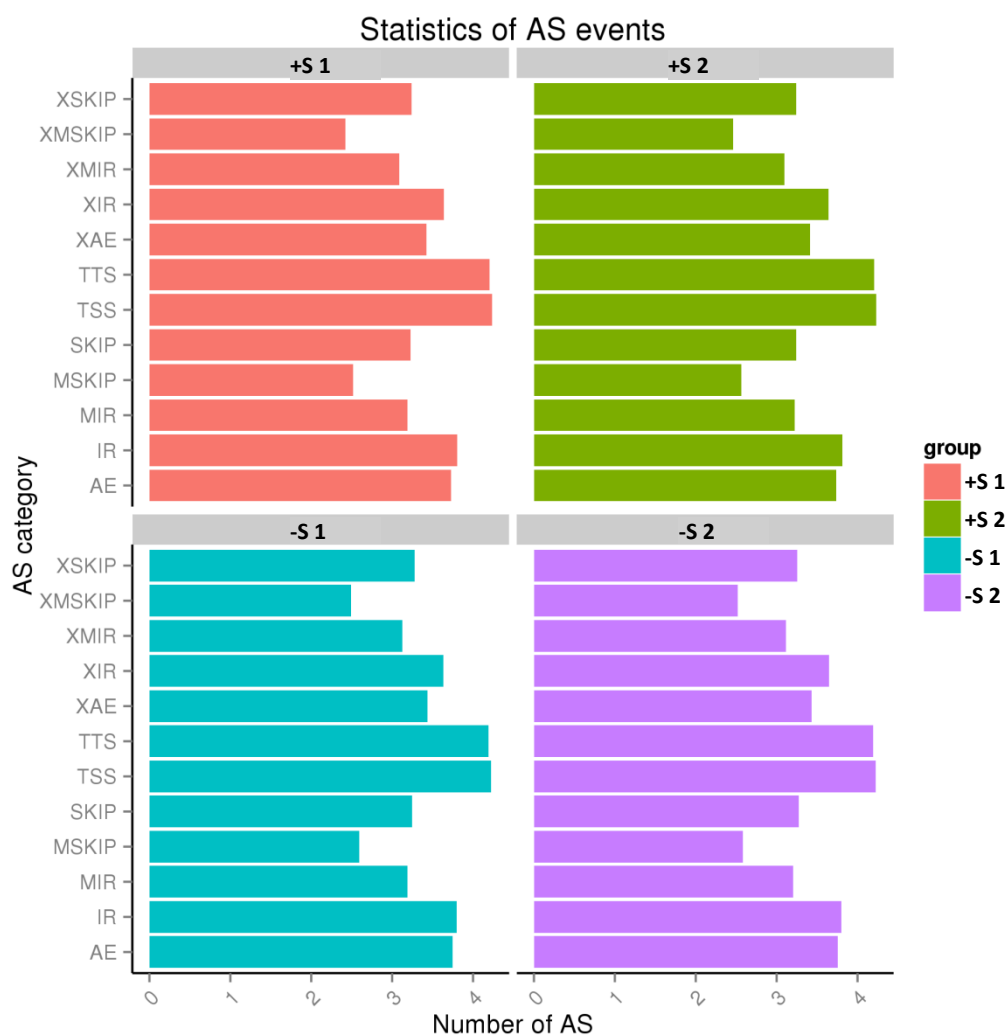

**Figure S1. Statistics of alternative splicing events.**

(1) TSS: Alternative 5' first exon. (2) TTS: Alternative 3' last exon. (3) SKIP: Skipped exon. (4) XSKIP: Approximate SKIP. (5) MSKIP: Multi-exon SKIP. (6) XMSKIP: Approximate MSKIP. (7) IR: Intron retention. (8) XIR: Approximate IR. (9) MIR: Multi-IR. (10) XMIR: Approximate MIR. (11) AE: Alternative exon ends (5', 3', or both). (12) XAE: Approximate AE. X axis: numbers of AS events. Y axis: events types.

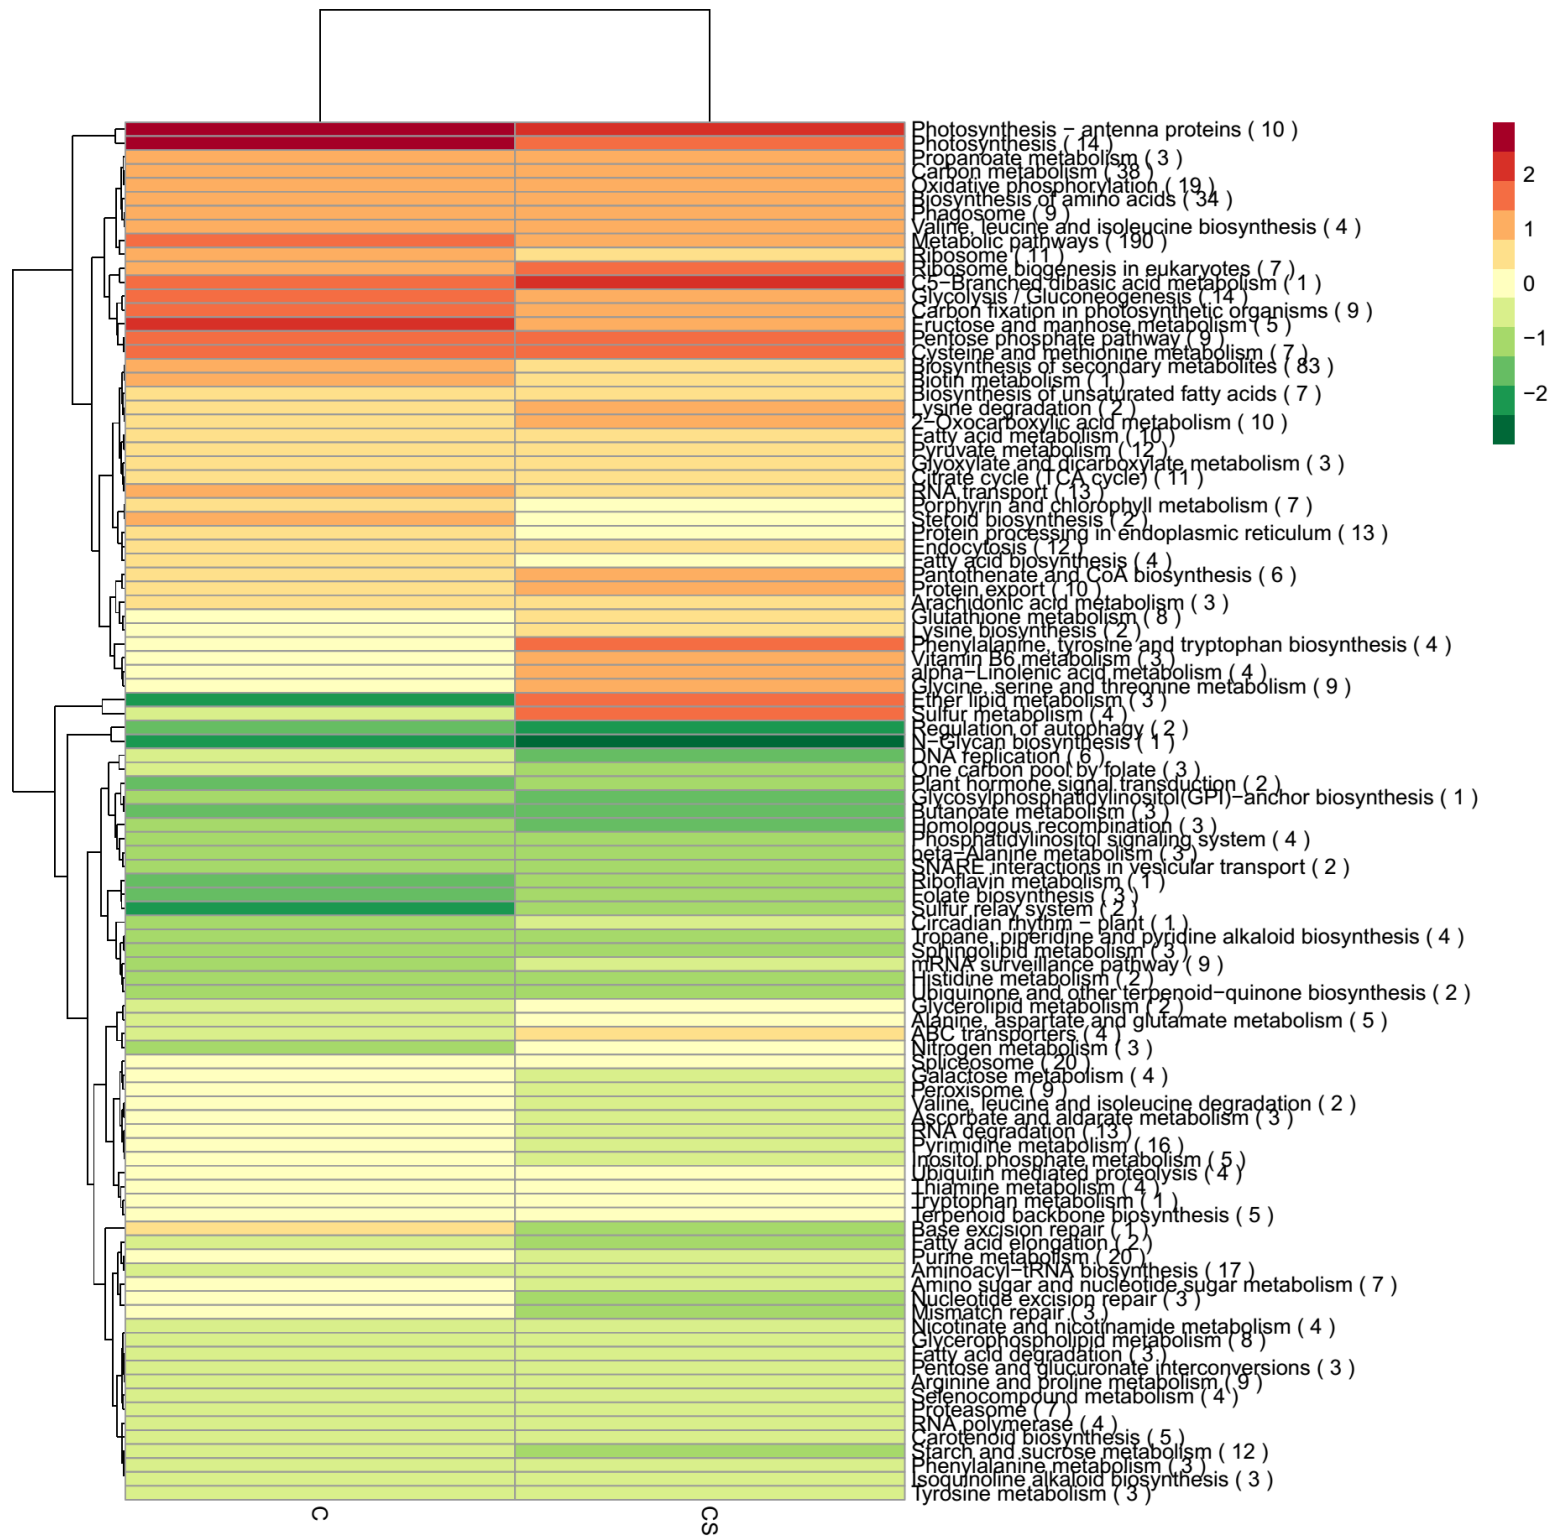

**Supplementary Figure S2.** KEGG enrichment analysis of lncRNA target genes significantly differentially expressed under sulfur-replete and sulfur-deprived conditions. Colors represent the expression levels of metabolic pathways. Red represents a high expressing metabolic pathway. Green represents a relatively low expressing metabolic pathway. The left column (+S) is the sulfur-replete sample and the right column (-S) is the sulfur-deprived sample. The numbers of significant different genes contained in each metabolic pathway are indicated in the parentheses after the label of each metabolic pathway.

Table S1. Reads mapping to the reference genome.

| Sample name      | C1                | C2                | CS1               | CS2               |
|------------------|-------------------|-------------------|-------------------|-------------------|
| Total reads      | 91425938          | 102815474         | 90389134          | 84422494          |
| Total mapped     | 86442571 (94.55%) | 97457645 (94.79%) | 84237229 (93.19%) | 79078218 (93.67%) |
| Multiple mapped  | 15371828 (16.81%) | 18795812 (18.28%) | 15276981 (16.9%)  | 13470770 (15.96%) |
| Uniquely mapped  | 71070743 (77.74%) | 78661833 (76.51%) | 68960248 (76.29%) | 65607448 (77.71%) |
| Read-1           | 35792638 (39.15%) | 39624245 (38.54%) | 34881093 (38.59%) | 33097592 (39.2%)  |
| Read-2           | 35278105 (38.59%) | 39037588 (37.97%) | 34079155 (37.7%)  | 32509856 (38.51%) |
| Reads map to '+' | 35574776 (38.91%) | 39386214 (38.31%) | 34517033 (38.19%) | 32828695 (38.89%) |
| Reads map to '-' | 35495967 (38.82%) | 39275619 (38.2%)  | 34443215 (38.11%) | 32778753 (38.83%) |
| Non-splice reads | 57869187 (63.3%)  | 64766137 (62.99%) | 53072328 (58.72%) | 50416096 (59.72%) |
| Splice reads     | 13201556 (14.44%) | 13895696 (13.52%) | 15887920 (17.58%) | 15191352 (17.99%) |



Supplementary Table S2. The qRT-PCR primers used in this study.

| Name                       | Primer Sequence          |
|----------------------------|--------------------------|
| U4-Forward Primer          | CAAAAGGCCCGACAGAAAT      |
| U4-Reverse Primer          | GTGAGGTCTAACCGAGTCGC     |
| XLOC_065013-Forward Primer | CCGTCGTGAGACAGGTTAGT     |
| XLOC_065013-Reverse Primer | CTTAGAGGCGTTCAGTCATTAG   |
| XLOC_032845-Forward Primer | CGCCTATGCCCTATGAT        |
| XLOC_032845-Reverse Primer | GTGTTTGTCTCGCACTCG       |
| XLOC_065816-Forward Primer | CGTATTCAAATCACGCACAG     |
| XLOC_065816-Reverse Primer | GTCGGGCAACATCTCAACT      |
| XLOC_039822-Forward Primer | TAAAGGTCTGGGTTTCG        |
| XLOC_039822-Reverse Primer | CCGCCTCATCCATTAC         |
| XLOC_024082-Forward Primer | TTGCGTCGCTGGCTGAAGA      |
| XLOC_024082-Reverse Primer | AAAGTTAGCACGGGTGAAGTAG   |
| XLOC_071550-Forward Primer | CAACGAGGAAACTCTACGC      |
| XLOC_071550-Reverse Primer | CCTGTGGGACCCTGACT        |
| XLOC_072235-Forward Primer | CGCCCTCAGCCCTTCAA        |
| XLOC_072235-Reverse Primer | GGGACGCAGCAAACAGG        |
| XLOC_063143-Forward Primer | TACACCCTCTTCCACAACCG     |
| XLOC_063143-Reverse Primer | CCCTACCTCCCAGATT         |
| XLOC_053622-Forward Primer | CCCTTGTCACATTTCGTGTTTAGC |
| XLOC_053622-Reverse Primer | GGTATCAAGTAATCCGACTGGTG  |
| XLOC_039515-Forward Primer | TGTCTGAGGTTCCGTCATTA     |
| XLOC_039515-Reverse Primer | CAGTCTGCGTGCGTGTA        |
| XLOC_070799-Forward Primer | ACCAAACCTTCGCTGATGC      |
| XLOC_070799-Reverse Primer | GTCGCTTGTGAGACGTGAT      |
| XLOC_041576-Forward Primer | TCAAACGCAAGCCACGAC       |
| XLOC_041576-Reverse Primer | ACGCCTCATCCTCTTTCTAC     |
| XLOC_077711-Forward Primer | GGTCCTTAGAGGGAGGCATT     |
| XLOC_077711-Reverse Primer | CCATTCTGACACCTAAGCACA    |
| XLOC_011459-Forward Primer | AGCATACCAACCCATCACA      |
| XLOC_011459-Reverse Primer | CCTCCCTAAGGCAACCAC       |
| XLOC_066806-Forward Primer | CCTGCCTCCTGCGTCTA        |
| XLOC_066806-Reverse Primer | CCTCCTGGGTCCATTCC        |
| XLOC_041867-Forward Primer | GCTCTGCTTCGCCCTTCA       |
| XLOC_041867-Reverse Primer | TGCCGCACCCTTCTTCG        |
| XLOC_014186-Forward Primer | CCCCAAACTAAACAGAACGA     |
| XLOC_014186-Reverse Primer | ACCGCATAACAGAAACAAAGC    |
| XLOC_067316-Forward Primer | GGACTGAGTGAAGGTGGATG     |
| XLOC_067316-Reverse Primer | ATACCTACGCACGGACCAA      |
| XLOC_079845-Forward Primer | CACAGCAACAGCGCCGTGAG     |
| XLOC_079845-Reverse Primer | GCAGTAGCCCCGACCAGGATG    |
| XLOC_071546-Forward Primer | CCCACGAACGATAGGTAA       |
| XLOC_071546-Reverse Primer | CTAGGAAACGCCACATT        |
| XLOC_078800-Forward Primer | CCCGCTGCAACCTAGAAAG      |
| XLOC_078800-Reverse Primer | CGAAACTACAACCGCCAAG      |
